# Supplementary material
Source: Springer Nature journal article supplement (https://www.springermedizin.de/resource/supplementary/12876_2011_777_MOESM2_ESM.pdf/9437764)
Supplement: MOESM2 [file 9437764]

**Additional file 2**

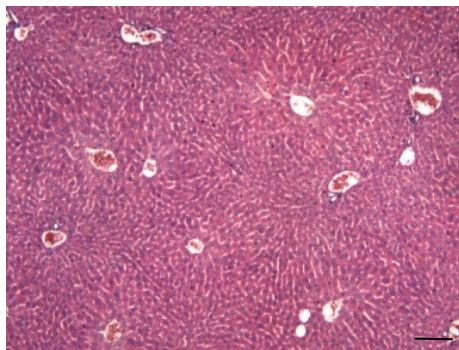

**PBS**

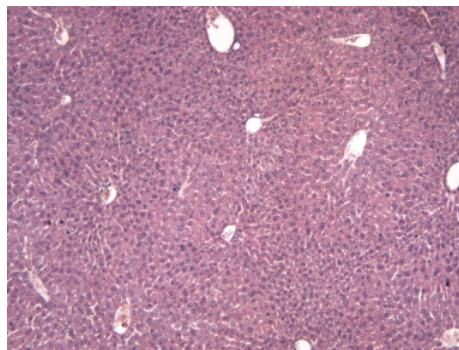

**MSCs**

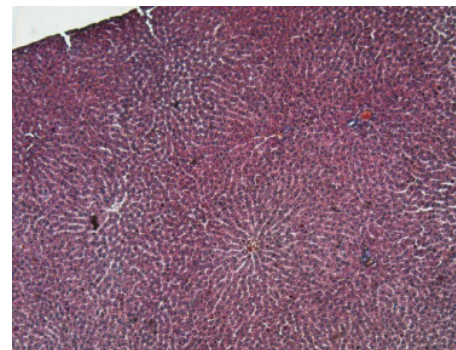

**OIL**
